# Supplementary material for: A Comparative Analysis to Dissect the Histological and Molecular Differences among Lipedema, Lipohypertrophy and Secondary Lymphedema
Source: MDPI journal article supplement (doi:10.3390/ijms24087591), 2023-04-20
Supplement: s1 [file s1]

**Suppl. Table S1. Primer Sequences**

| <b>Primer</b>   | <b>Sequence (5' to 3')</b> |
|-----------------|----------------------------|
| B2M forward     | TGTGCTCGCGCTACTCTCTCT      |
| B2M reverse     | CGGATGGATGAAACCCAGACA      |
| VEGF A forward  | CTACCTCCACCATGCCAAGT       |
| VEGF A reverse  | GCAGTAGCTGCGCTGATAGA       |
| VEGF C forward  | CACCACCAAACATGCAGCTG       |
| VEGF C reverse  | TGAAAATCCTGGCTCACAAGC      |
| VEGF D forward  | ATGGACCAGTGAAGCGATCAT      |
| VEGF D reverse  | G TTCCTCCAAACTAGAAGCAGC    |
| VEGF-R2 forward | GGCCCAATAATCAGAGTGGCA      |
| VEGF-R2 reverse | TGTCATTTCCGATCACTTTTGGA    |
| VEGF-R3 forward | TCTGCTACAGCTTCCAGGTGG      |
| VEGF-R3 reverse | GCAGCCAGGTCTCTGTGGAT       |
| CLDN5 forward   | GGGAACTTCCTGAAGTGG TGT     |
| CLDN5 reverse   | TCCCATGGCAAACAGAGAGG       |
| TJP1 forward    | GGAGAGGTGTTCCGTGTTGT       |
| TJP1 reverse    | GAGCGGACAAATCCTCTCTG       |
| GJA1 forward    | GGAGATGAGCAGTCTGCCTTTC     |
| GJA1 reverse    | TGAGCCAGGTACAAGAGTGTGG     |
| CD4 forward     | CCTCCTGCTTTTCATTGGGCTAGG   |
| CD4 reverse     | TGAGGACACTGGCAGGTCTTCT     |
| CD45 forward    | CTTCAGTGGTCCCATTGTGGTG     |
| CD45 reverse    | CCACTTTGTTCTCGGCTTCCAG     |
| CD68 forward    | CGAGCATCATTCTTTCACCAGCT    |
| CD68 reverse    | ATGAGAGGCAGCAAGATGGACC     |
| CD163 forward   | ACATAGATCATGCATCTGTCATTG   |
| CD163 reverse   | ATTCTCCTTGGAATCTCACTTCTA   |
